# Supplementary material
Source: PubMed Central journal article supplement (PMC7484180)
Supplement: JB.00377-20-s0001.pdf [file JB.00377-20-s0001.pdf]

1 **Supplementary materials**

2 Table S1. Strains and plasmids used in this study

3

| Name                                   | Description                                                                                                                                                                       | Reference                          |
|----------------------------------------|-----------------------------------------------------------------------------------------------------------------------------------------------------------------------------------|------------------------------------|
| <b><i>Escherichia coli</i></b>         |                                                                                                                                                                                   |                                    |
| DH5α                                   | F- φ80 <i>lacZ</i> ΔM15<br>Δ( <i>lacZYA-argF</i> )U169<br><i>recA1 endA1 hsdR17</i> (r <sup>-</sup> ,<br>m <sup>+</sup> ) <i>phoA supE44 thi-1</i><br><i>gyrA96 relA1 λ- tonA</i> | New<br>England<br>Biolabs<br>(NEB) |
| BL21                                   | <i>fhuA2 [lon] ompT gal [dcm] ΔhsdS</i>                                                                                                                                           | NEB                                |
| HB101                                  |                                                                                                                                                                                   | NEB                                |
| HB101 pRK24                            | HB101 transformed with pRK24                                                                                                                                                      | (1)                                |
| RT1255                                 | pMMBneo:: <i>R20291_rsh</i> -His6 in<br>DH5α                                                                                                                                      | (2)                                |
| RT1270                                 | pMMBneo:: <i>R20291_rsh</i> -His6 in<br>BL21                                                                                                                                      | (2)                                |
| <b><i>Clostridioides difficile</i></b> |                                                                                                                                                                                   |                                    |
| 630                                    | Wild type                                                                                                                                                                         |                                    |
| 630Δ <i>erm</i>                        | Wild type 630 lacking erythromycin<br>resistance gene <i>ermB</i>                                                                                                                 | (3)                                |
| R20291                                 | Wild type                                                                                                                                                                         |                                    |
| CEP18                                  | pRF185:: <i>phiLOV2.12.1</i> in R20291                                                                                                                                            | This study                         |
| CEP19                                  | pRF185:: <i>phiLOV2.12.1</i> in<br>630Δ <i>erm</i>                                                                                                                                | This study                         |
| CEP21                                  | PrelQ630Δ <i>erm</i> :: <i>phiLOV2.12.1</i> in<br>R20291                                                                                                                          | This study                         |
| CEP22                                  | Prsh630Δ <i>erm</i> :: <i>phiLOV2.12.1</i> in<br>630Δ <i>erm</i>                                                                                                                  | This study                         |
| CEP23                                  | PrelQ630Δ <i>erm</i> :: <i>phiLOV2.12.1</i> in<br>630Δ <i>erm</i>                                                                                                                 | This study                         |
| CEP25                                  | PrshR20291:: <i>phiLOV2.12.1</i> in<br>R20291                                                                                                                                     | This study                         |
| <b><i>Plasmids</i></b>                 |                                                                                                                                                                                   |                                    |
| pMMBneo                                | Low copy expression vector, <i>Ptac</i> ,<br><i>neo</i> cassette, <i>KanR</i>                                                                                                     | (2)                                |
| pRF185                                 | <i>tetR</i>                                                                                                                                                                       | (4)                                |

|                                             |                                                                                                                                 |            |
|---------------------------------------------|---------------------------------------------------------------------------------------------------------------------------------|------------|
| pMMBneo::R20291_ <i>rsh</i> -His6           | R20291 <i>rsh</i> ligated into KpnI/PstI sites of pMMBneo                                                                       | (2)        |
| pMMBneo::R20291_ <i>rshREL</i> -His6        | <i>rel</i> amplified from R20291 <i>rsh</i> and ligated into KpnI/PstI sites of pMMBneo                                         | This study |
| pRF185::phiLOV2.12.1                        | <i>phiLOV2.1</i> downstream of tetracycline-inducible promoter ligated into BamHI/KpnI sites of pRF185                          | (4)        |
| PrelQ630 $\Delta$ <i>erm</i> ::phiLOV2.12.1 | Predicted promoter upstream of 630 $\Delta$ <i>erm relQ</i> amplified and ligated into BamHI/KpnI sites of pRF185::phiLOV2.12.1 | This study |
| Prsh630 $\Delta$ <i>erm</i> ::phiLOV2.12.1  | Predicted promoter upstream of 630 $\Delta$ <i>erm rsh</i> amplified and ligated into BamHI/KpnI sites of pRF185::phiLOV2.12.1  | This study |
| PrshR20291::phiLOV2.12.1                    | Predicted promoter upstream of R20291 <i>rsh</i> amplified and ligated into BamHI/KpnI sites of pRF185::phiLOV2.12.1            | This study |
| pMSPT                                       | Low copy expression vector                                                                                                      | (5)        |
| pMSPT:: <i>as_rsh</i>                       | Antisense RNA to the mRNA of <i>rshCd</i> ligated into the SphI/XhoI sites of pMSPT                                             | This study |

4  
5

6 Table S2. Sequences of oligonucleotide primers used in this study

| Name                   | Sequence (5' to 3')                                         | Reference  |
|------------------------|-------------------------------------------------------------|------------|
| <b>Cloning primers</b> |                                                             |            |
| rsh_F KpnI             | CAGGTACCGGTTATATGCATGATAAAG<br>AATTACAAG                    | (2)        |
| rsh_R PstI             | CCCTGCAGCTAATGGTGATGGTGATGGTGAT<br>TTGTCATTCTATAAATAC       | (2)        |
| pRF185_F               | CTGGACTTCATGAAAACTAAAAAATATTG                               | This study |
| pRF185_R               | CACCGACGAGCAAGGCAAGACCG                                     | This study |
| phiLOV2.1_F            | GCTAGCCCAGGTATGATTGAAAAAGTTTTG<br>TTATTACTG                 | This study |
| phiLOV2.1_R            | CATGGATCCTTATTAACATGATCTG                                   | This study |
| Prsh_F BamHI           | TATAGGATCCGGAAAGTTACCAGGTGAAGTT<br>GA                       | This study |
| Prsh_R KpnI            | ATATGGTACCCACCTATTTTGTATAAAATTT<br>TAATATATATG              | This study |
| PrelQ_F BamHI          | TATAGGATCCATGGCAAGCAAGTTATATCG                              | This study |
| PrelQ_R KpnI           | ATATGGTACCCCTTTATTTGTTTTTATGACCT<br>TC                      | This study |
| relQ_F                 | CAAGAATTCCACTATGGAGCTTGTAATCA                               | This study |
| relQ_R                 | CAAGGATCCCATATTGCTCACCCCTTATTTG                             | This study |
| pMSPT_F                | CTAAAGGGCAAAGTGAGTATGG                                      | This study |
| pMSPT_R                | GACGAGCAAGGCAAGACC                                          | This study |
| rsh_as_F               | GGTATGCATGCTGCATAAAC                                        | This study |
| rsh_as_R               | CCTAGCTCTCGAGACCAAC                                         | This study |
| rshREL_F KpnI          | CAGGTACCATGAAAGAAGAACTCAATCTG                               | This study |
| rshREL_R PstI          | CCCTGCAGCTAATGGTGATGGTGATGGTGA<br>CTATTAATACATCTTCTTTAAGTGC | This study |
| <b>qRT-PCR primers</b> |                                                             |            |
| rpoCq_F                | CTAGCTGCTCCTATGTCTCACATC                                    | (1)        |
| rpoCq_R                | CCAGTCTCTCCTGGATCAACTA                                      | (1)        |

|         |                          |            |
|---------|--------------------------|------------|
| rsh_qF  | AAAATAGGTGGTTAT          | This study |
| rsh_qR  | TCAATTTTATTATCCCTCCTTTGA | This study |
| relQ_qF | CATTGCGGGTTCAAAGGAAAT    | This study |
| relQ_qR | CATTGCGGGTTCAAAGGAAAT    | This study |

7

8 Underlined: restriction sites

9 Bold: sequence encoding hexa-histidine tag

10

11  
12  
13  
14  
15  
16  
17  
18  
19  
20

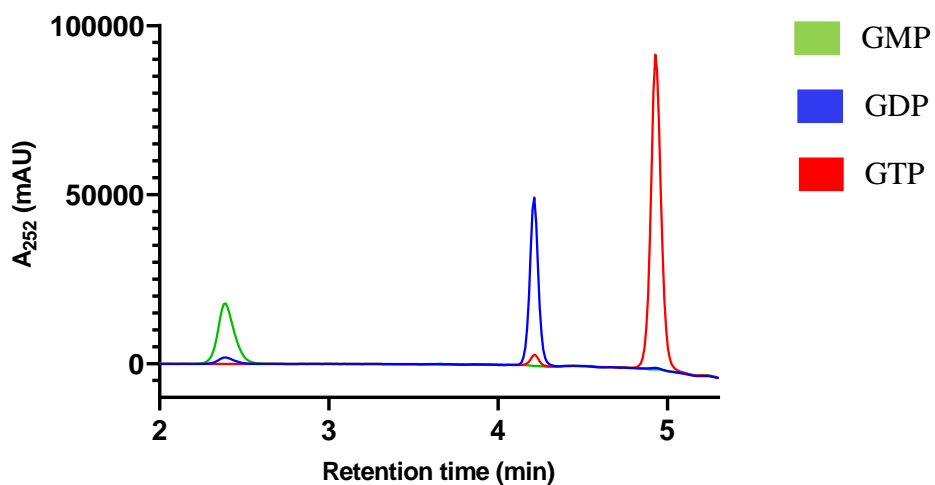

21 **Figure S1. HPLC chromatogram of nucleotides.** GTP, GDP, and GMP  
22 standards run separately at 20  $\mu$ M concentration. Peaks resolved at 252 nm  
23 demonstrate that RSHCd's inability to utilize GTP for a substrate is not an artifact  
24 of substrate breakdown and/or contamination.

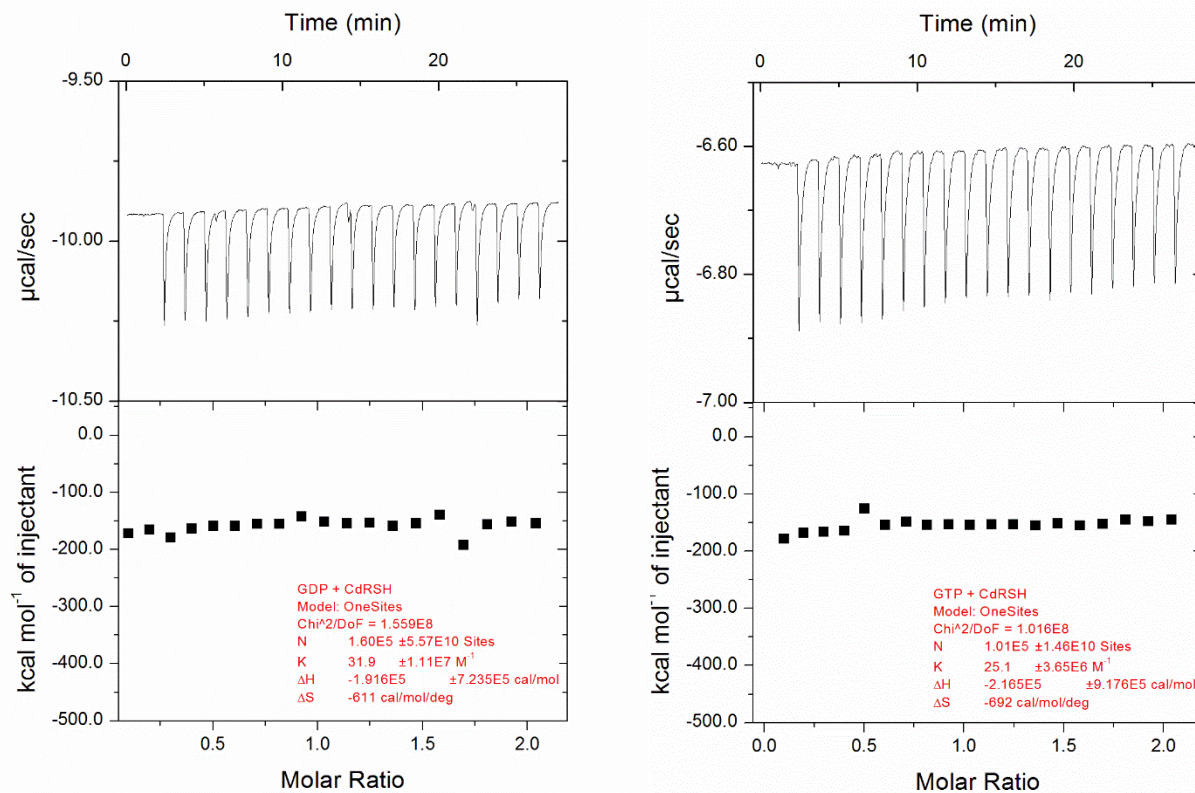

25

26 **Figure S2. ITC thermogram and Wiseman plots of RSHCd interactions with**

27 **GXP at 37°C.** Binding of RSHCd to GDP (left) and GTP (right). The upper panels

28 show raw data for titration of GXP with RSHCd, and the lower panels show the

29 integrated heats of binding obtained from the raw data. The data were fitted to a

30 single-binding site model. Each value is the average of three repeat experiments

31 and the standard deviation  $\pm$  are shown.

32

33

34

35

36

37

38

39

40

41

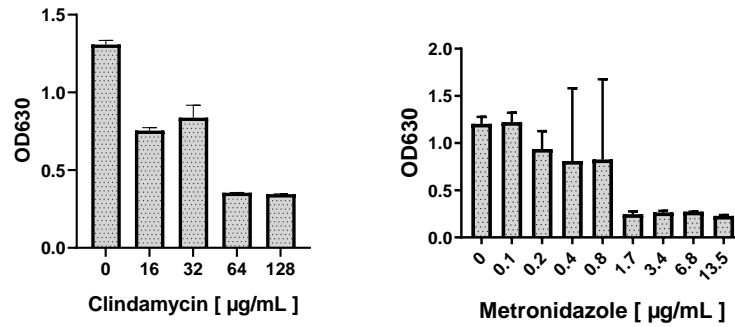

42

43

44

45

46

47

48

| Sublethal concentration | Clindamycin (µg/mL) | Metronidazole (µg/mL) |
|-------------------------|---------------------|-----------------------|
| <b>0.25X</b>            | 4.00                | 0.075                 |
| <b>0.5X</b>             | 8.00                | 0.15                  |
| <b>1X</b>               | 16.0                | 0.30                  |

49

**Figure S3. Sublethal concentrations for clindamycin and metronidazole**

50

**against R20291.** Sublethal concentrations of antibiotics for wild-type *C. difficile*

51

strain R20291 were analyzed using the standard minimum inhibitory

52

concentrations (MICs) determination method. ON starter culture of R20291 was

53

inoculated (1:10) into fresh BHIS media treated with increasing concentrations of

54

either clindamycin or metronidazole. Cells were incubated anaerobically at 37°C

55

for 12 h to monitor growth inhibition. The sublethal concentrations are shown for

56

four biological replicates.

57  
58  
59  
60  
61  
62  
63  
64  
65  
66  
67  
68  
69  
70  
71  
72  
73  
74  
75  
76  
77  
78  
79  
80  
81  
82  
83

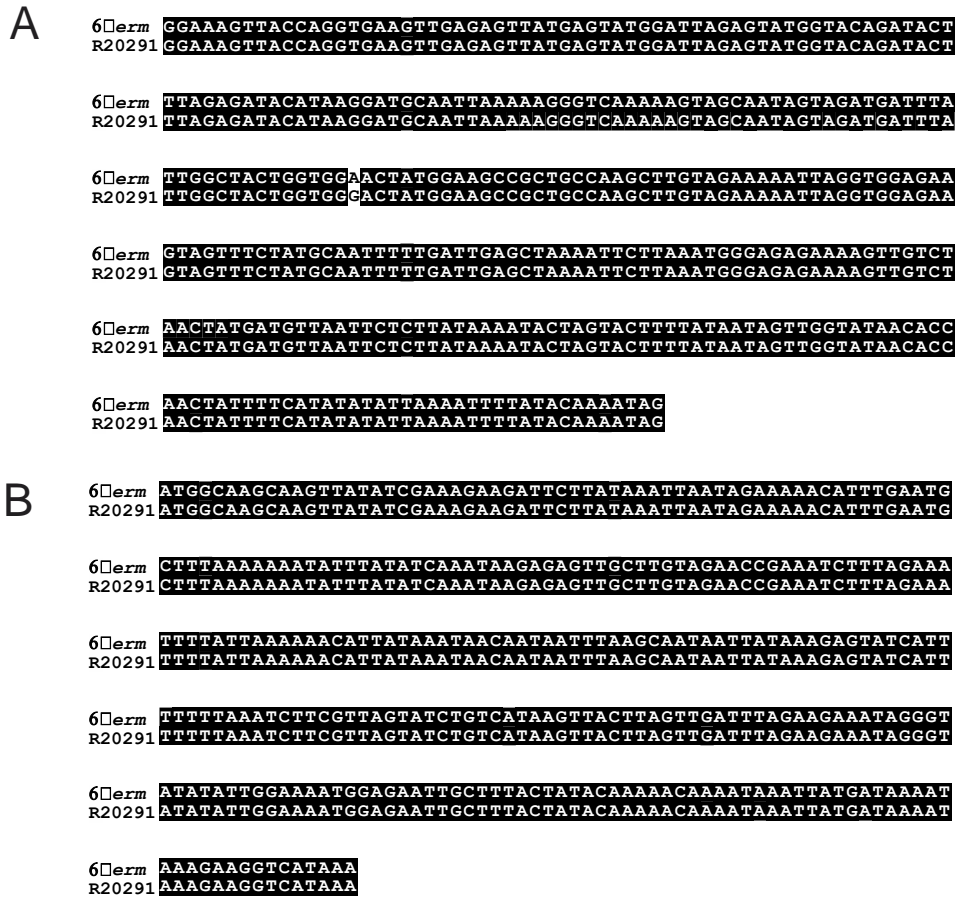

**Figure S4.** Sequence alignments of the upstream promoter regions used in the  
(A) *Prsh* and (B) *PreIQ* transcriptional reporters.



84  
85  
86  
87  
88  
89  
90  
91  
92  
93  
94  
95  
96  
97  
98  
99  
100  
101  
102  
103  
104  
105  
106  
107  
108  
109  
110  
111  
112  
113  
114  
115  
116  
117

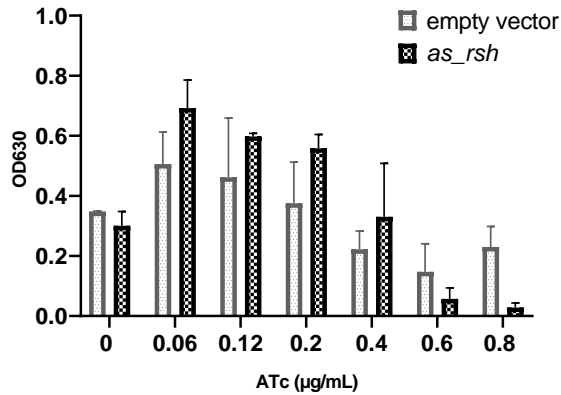

**Figure S5: Minimum inhibitory concentration for ATc against *C. difficile* RNAi strains.** MIC for *C. difficile* R20291 RNAi strain harboring the respective plasmids were analyzed in BHIS plus thiamphenicol (15 µg/mL) media with increasing concentrations of ATc. ON starter cultures of RNAi strains were inoculated into media (1:20) and incubated anaerobically at 37°C for 24 h to monitor growth inhibition. The MIC against empty vector (pMSPT) and asRNA vector (*as\_rsh*) expressing strains are shown for two biological replicates. 0.5 µg/mL was determined to be the sublethal concentration of ATc against both RNAi strains to be used for end point growth assays.

118  
119  
120  
121  
122  
123  
124  
125  
126  
127  
128  
129  
130  
131  
132  
133  
134  
135  
136  
137  
138  
139  
140  
141  
142  
143  
144  
145  
146  
147  
148  
149  
150  
151  
152  
153  
154  
155  
156

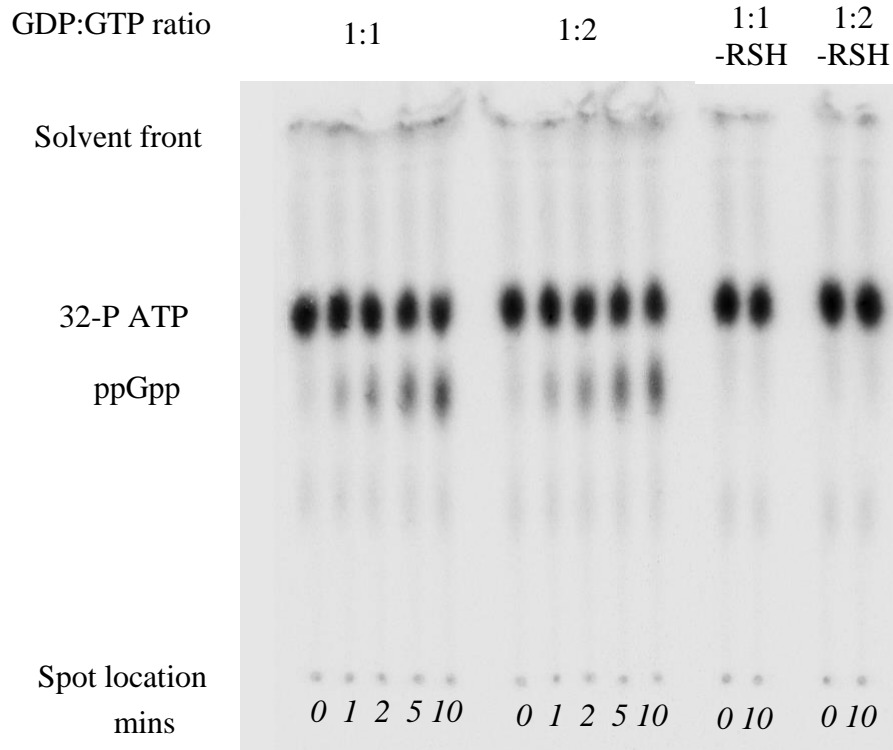

**Figure S6: TLC autoradiogram of *in vitro* RSHCd transferase activity at different GDP:GTP ratio.** *In vitro* transferase reaction using equimolar concentration of GDP and GTP (0.15 mM each) and 2X more GTP (0.2 mM) than GDP (0.1mM) keeping the total [substrate] equivalent to 0.3 mM. Failure to detect pppGpp suggests that RSHCd is incapable of utilizing GTP at equimolar concentration of GDP and at excess concentration of GTP than GDP.

157 **Works cited:**

158

- 159 1. Purcell, E. B., McKee, R. W., McBride, S. M., Waters, C. M., and Tamayo, R.  
160 (2012) Cyclic diguanylate inversely regulates motility and aggregation in  
161 *Clostridium difficile*. *Journal of bacteriology* **194**, 3307-3316
- 162 2. Pokhrel, A., Poudel, A., and Purcell, E. B. (2018) A Purification and In Vitro  
163 Activity Assay for a (p) ppGpp Synthetase from *Clostridium difficile*. *JoVE*  
164 (*Journal of Visualized Experiments*), e58547
- 165 3. Hussain, H. A., Roberts, A. P., and Mullany, P. (2005) Generation of an  
166 erythromycin-sensitive derivative of *Clostridium difficile* strain 630  
167 (630Deltaerm) and demonstration that the conjugative transposon Tn916DeltaE  
168 enters the genome of this strain at multiple sites. *J Med Microbiol* **54**, 137-141
- 169 4. Buckley, A. M., Jukes, C., Candlish, D., Irvine, J. J., Spencer, J., Fagan, R. P.,  
170 Roe, A. J., Christie, J. M., Fairweather, N. F., and Douce, G. R. (2016) Lighting  
171 Up *Clostridium Difficile*: Reporting Gene Expression Using Fluorescent Lov  
172 Domains. *Scientific Reports* **6**, 23463
- 173 5. Marreddy, R. K., Wu, X., Sapkota, M., Prior, A. M., Jones, J. A., Sun, D.,  
174 Hevener, K. E., and Hurdle, J. G. (2018) The fatty acid synthesis protein enoyl-  
175 ACP reductase II (FabK) is a target for narrow-spectrum antibacterials for  
176 *Clostridium difficile* infection. *ACS infectious diseases* **5**, 208-217
- 177
